# Supplementary material
Source: MDPI journal article supplement (https://www.mdpi.com/2076-3263/12/11/415)
Supplement: s1 [file s1]

# Supplementary materials

**Table S1** Spatial and temporal variation of irrigation hazards

| Season       | Types         | Station     | Parameter | SAR  | %NA   | SSP   | MR    | PS   | Average ion balance error (%) |
|--------------|---------------|-------------|-----------|------|-------|-------|-------|------|-------------------------------|
| Pre-monsoon  | Surface water | Bamdeb ghat | 2019      | 1.28 | 34.90 | 32.52 | 49.24 | 3.27 | 1.70                          |
|              |               |             | 2018      | 0.93 | 34.18 | 31.87 | 49.93 | 0.63 | 3.43                          |
|              |               |             | 2017      | 1.41 | 44.36 | 41.58 | 33.02 | 2.13 | 6.69                          |
|              |               | Suri        | 2019      | 1.01 | 36.74 | 33.42 | 50.00 | 0.90 | 4.69                          |
|              |               |             | 2018      | 0.94 | 23.75 | 22.03 | 42.94 | 0.46 | 5.82                          |
|              |               |             | 2017      | 0.82 | 29.00 | 27.26 | 37.04 | 0.27 | 3.80                          |
|              | Groundwater   | Bakreswar   | 2019      | 0.98 | 76.23 | 76.05 | 50.00 | 4.62 | -8.09                         |
|              |               |             | 2018      | 0.63 | 80.55 | 80.30 | 20.00 | 3.40 | -16.93                        |
|              |               |             | 2017      | 0.63 | 80.88 | 80.65 | 35.27 | 2.55 | -20.84                        |
|              |               | Bolpur      | 2019      | 1.67 | 13.92 | 13.03 | 50.00 | 1.50 | 4.83                          |
|              |               |             | 2018      | 1.81 | 16.67 | 16.12 | 47.56 | 4.48 | -0.36                         |
|              |               |             | 2017      | 1.37 | 22.76 | 22.35 | 36.45 | 2.67 | 3.74                          |
|              |               | Nalhati     | 2019      | 1.50 | 37.04 | 36.72 | 55.36 | 7.46 | -5.84                         |
|              |               |             | 2018      | 1.44 | 33.95 | 33.41 | 46.15 | 5.60 | 3.34                          |
|              |               |             | 2017      | 2.04 | 19.29 | 19.09 | 51.77 | 3.80 | 4.47                          |
|              |               | Suri        | 2019      | 1.25 | 42.70 | 40.92 | 50.00 | 4.90 | -11.51                        |
|              |               |             | 2018      | 1.55 | 24.04 | 22.47 | 42.50 | 3.78 | -8.58                         |
|              |               |             | 2017      | 1.57 | 25.28 | 23.18 | 31.42 | 3.08 | -2.24                         |
| Post-monsoon | Surface water | Bamdeb ghat | 2019      | 1.03 | 44.44 | 41.96 | 43.27 | 1.32 | -2.00                         |
|              |               |             | 2018      | 1.01 | 34.00 | 32.17 | 47.55 | 0.87 | 3.86                          |
|              |               |             | 2017      | 1.40 | 21.97 | 20.05 | 19.35 | 1.17 | 28.51                         |
|              |               | Suri        | 2019      | 0.86 | 49.36 | 46.69 | 46.75 | 0.60 | -5.69                         |
|              |               |             | 2018      | 0.91 | 28.58 | 26.36 | 50.30 | 0.48 | 4.14                          |
|              |               |             | 2017      | 0.85 | 25.61 | 23.31 | 35.69 | 0.58 | 1.50                          |
|              | Groundwater   | Bakreswar   | 2019      | 0.31 | 96.18 | 96.13 | 39.10 | 2.67 | -54.31                        |
|              |               |             | 2018      | 0.63 | 88.64 | 88.38 | 45.00 | 5.64 | -26.78                        |
|              |               |             | 2017      | 0.55 | 90.52 | 90.40 | 33.33 | 2.89 | -28.51                        |
|              |               | Bolpur      | 2019      | 1.99 | 23.02 | 22.36 | 2.94  | 3.58 | 8.72                          |
|              |               |             | 2018      | 1.60 | 29.46 | 28.96 | 51.56 | 0.74 | 9.00                          |

|  |  |         |      |      |       |       |       |      |        |
|--|--|---------|------|------|-------|-------|-------|------|--------|
|  |  |         | 2017 | 0.77 | 73.07 | 71.43 | 33.33 | 5.32 | -14.30 |
|  |  | Nalhati | 2019 | 2.26 | 17.54 | 17.10 | 27.52 | 6.42 | 5.12   |
|  |  |         | 2018 | 2.19 | 18.99 | 18.46 | 48.33 | 8.11 | 5.39   |
|  |  |         | 2017 | 1.11 | 46.60 | 45.70 | 51.61 | 4.04 | -8.09  |
|  |  | Suri    | 2019 | 1.82 | 18.56 | 17.02 | 53.80 | 3.01 | 2.18   |
|  |  |         | 2018 | 1.91 | 15.10 | 14.33 | 53.85 | 5.23 | 2.41   |
|  |  |         | 2017 | 1.11 | 39.54 | 35.94 | 50.00 | 3.08 | -12.46 |

**Table S2** Spatial and temporal variation of EC, Mg and Na

| Water type    | Station     | year       | Pre-monsoon                     |                 |               | Post-monsoon                    |                  |               |
|---------------|-------------|------------|---------------------------------|-----------------|---------------|---------------------------------|------------------|---------------|
|               |             |            | Electrical Conductivity (µs/cm) | Magnesium(mg/L) | Sodium (mg/L) | Electrical Conductivity (µs/cm) | Magnesium (mg/L) | Sodium (mg/L) |
| Surface water | Bamdeb ghat | 2019       | 551.85                          | 19.44           | 36.475        | 254                             | 11.03            | 35.3275       |
|               |             | 2018       | 218.8                           | 10.44           | 18.75         | 200.375                         | 11.64            | 22.25         |
|               |             | 2017       | 639.7                           | 15.7325         | 65            | 353                             | 9.16             | 22.75         |
|               | Suri        | 2019       | 190.1                           | 12.16           | 23.4          | 147.825                         | 8.26             | 29.66         |
|               |             | 2018       | 160.075                         | 9.12            | 11.5          | 153.775                         | 10.08            | 13.75         |
|               |             | 2017       | 168.825                         | 5.93            | 11.5          | 172.425                         | 6.1275           | 10            |
|               | Groundwater | Bakreshwar | 2019                            | 636.1           | 11.52         | 140.2                           | 531.6            | 0.89          |
|               |             |            | 2018                            | 550.9           | 1.92          | 75                              | 580.7            | 4.32          |
|               |             |            | 2017                            | 568.2           | 3.4           | 77                              | 536.5            | 2.4           |
|               |             | Bolpur     | 2019                            | 569.3           | 33.6          | 19.3                            | 1056             | 2.8           |
|               |             |            | 2018                            | 886.8           | 37.44         | 29                              | 434              | 31.68         |
|               |             |            | 2017                            | 528.3           | 16.52         | 25                              | 823.5            | 4.8           |
|               |             | Nalhati    | 2019                            | 1233            | 29.76         | 59.8                            | 1168             | 33.64         |
|               |             |            | 2018                            | 915.1           | 23.04         | 48                              | 955.9            | 55.68         |
|               |             |            | 2017                            | 931.7           | 51.52         | 45                              | 860.4            | 15.36         |
|               |             | Suri       | 2019                            | 834.8           | 18.72         | 49.7                            | 666.9            | 42.99         |
|               |             |            | 2018                            | 742.1           | 24.48         | 32                              | 753.7            | 47.04         |
|               |             |            | 2017                            | 708.5           | 18.47         | 34                              | 840.8            | 14.88         |

**Table S3** Spatial and temporal variation of saturation indices of different minerals

| Sample type   | Station     | year | Anhydrite |          | Gypsum  |          | Sylvite |          | Halite  |          |
|---------------|-------------|------|-----------|----------|---------|----------|---------|----------|---------|----------|
|               |             |      | Pre-mon   | Post-mon | Pre-mon | Post-mon | Pre-mon | Post-mon | Pre-mon | Post-mon |
| Surface water | Bamdeb ghat | 2019 | -0.51     | -0.17    | -0.21   | 0.13     | -4.30   | -4.76    | -4.23   | n/a      |
|               |             | 2018 | -0.60     | -0.45    | -0.29   | -0.15    | -5.30   | -5.19    | -5.23   | n/a      |
|               |             | 2017 | -0.37     | -0.18    | -0.07   | 0.12     | -4.23   | -4.94    | -4.18   | n/a      |
|               | Suri        | 2019 | -0.50     | -0.30    | -0.20   | 0.00     | -4.90   | -5.23    | -4.98   | n/a      |
|               |             | 2018 | -0.60     | -0.66    | -0.30   | -0.36    | -5.69   | -5.51    | -5.59   | n/a      |
|               |             | 2017 | -0.66     | -0.48    | -0.35   | -0.17    | -6.01   | -5.53    | -5.85   | n/a      |
| Groundwater   | Bakreshwar  | 2019 | -0.34     | -1.01    | -0.04   | -0.71    | -4.66   | -4.79    | -3.53   | n/a      |
|               |             | 2018 | -0.46     | -0.47    | -0.16   | -0.17    | -4.83   | -4.16    | -3.91   | n/a      |
|               |             | 2017 | -0.47     | -0.50    | -0.17   | -0.19    | -4.97   | -4.72    | -4.04   | n/a      |
|               | Bolpur      | 2019 | -0.21     | -0.27    | 0.09    | 0.02     | -5.12   | -4.62    | -4.89   | n/a      |
|               |             | 2018 | 0.30      | -0.87    | 0.60    | -0.57    | -4.81   | -5.48    | -4.28   | n/a      |
|               |             | 2017 | -0.12     | -0.29    | 0.18    | 0.01     | -5.25   | -3.95    | -4.50   | n/a      |
|               | Nalhati     | 2019 | 0.06      | 0.36     | 0.35    | 0.65     | -4.72   | -4.54    | -3.72   | n/a      |
|               |             | 2018 | -0.16     | 0.15     | 0.14    | 0.44     | -4.65   | -4.36    | -3.91   | n/a      |
|               |             | 2017 | 0.15      | -0.05    | 0.45    | 0.25     | -5.17   | -4.62    | -4.15   | n/a      |
|               | Suri        | 2019 | 0.11      | 0.18     | 0.41    | 0.48     | -4.26   | -4.50    | -4.01   | n/a      |
|               |             | 2018 | 0.39      | 0.18     | 0.69    | 0.48     | -4.54   | -4.54    | -4.37   | n/a      |
|               |             | 2017 | 0.32      | 0.04     | 0.62    | 0.34     | -4.44   | -4.31    | -4.39   | n/a      |
